# Supplementary material for: Gender Differences of B Cell Signature in Healthy Subjects Underlie Disparities in Incidence and Course of SLE Related to Estrogen
Source: PubMed Central journal article supplement (PMC3987971; doi:10.1155/2014/814598), 2014-02-13

**Suppl. Table 1.** 26 down-regulated expression genes in SLE females vs SLE males, which of most genes were linked to Y chromosome

| Gene ID             | q-value<br>e(%) | Fold<br>Change | Chrom<br>osomal | Symbol          | Full name                                                              |
|---------------------|-----------------|----------------|-----------------|-----------------|------------------------------------------------------------------------|
| NM_004653           | 0               | 0.0011         | chrY            | SMCY            | Smcy homolog, Y-linked (mouse)                                         |
| D87072              | 0               | 0.0019         | chrY            | SMCY            | Smcy homolog, Y-linked (mouse)                                         |
| NM_032576           | 0               | 0.0021         | chrY            | CYorf15B        | chromosome Y open reading frame 15B                                    |
| NM_004654           | 0               | 0.0027         | chrY            | USP9Y           | ubiquitin specific peptidase 9, Y-linked (fat facets-like, Drosophila) |
| NM_004681           | 0               | 0.0028         | chrY            | EIF1AY          | eukaryotic translation initiation factor 1A, Y-linked                  |
| BC100905            | 0               | 0.0041         | chrY            | RPS4Y1          | ribosomal protein S4, Y-linked 1                                       |
| NM_004660           | 0               | 0.0055         | chrY            | DDX3Y           | DEAD (Asp-Glu-Ala-Asp) box polypeptide 3, Y-linked                     |
| NM_001008           | 0               | 0.0072         | chrY            | RPS4Y1          | ribosomal protein S4, Y-linked 1                                       |
| NM_182659           | 0               | 0.0087         | chrY            | UTY             | ubiquitously transcribed tetratricopeptide repeat gene, Y-linked       |
| AF332239            | 0               | 0.0096         | chrY            | TTY10           | testis-specific transcript, Y-linked 10                                |
| <b>NM_001005852</b> | <b>0</b>        | <b>0.0102</b>  | <b>chrY</b>     | <b>CYorf15A</b> | <b>chromosome Y open reading frame 15A</b>                             |
| BC035312            | 0               | 0.0103         | chrY            | CYorf15B        | chromosome Y open reading frame 15B                                    |
| BC110817            | 0               | 0.0104         | chrY            | CYorf15A        | chromosome Y open reading frame 15A                                    |
| NM_003411           | 0               | 0.0113         | chrY            | ZFY             | zinc finger protein, Y-linked                                          |
| NM_182660           | 0               | 0.0221         | chrY            | UTY             | ubiquitously transcribed tetratricopeptide repeat gene, Y-linked       |
| NM_007125           | 0               | 0.0285         | chrY            | UTY             | ubiquitously transcribed tetratricopeptide repeat gene, Y-linked       |
| BC034942            | 0               | 0.0572         | chrY            | DDX3Y           | DEAD (Asp-Glu-Ala-Asp) box polypeptide 3, Y-linked                     |
| <b>BC093959</b>     | <b>4.9773</b>   | <b>0.0635</b>  | <b>chr8</b>     | <b>DEFA4</b>    | <b>defensin, alpha 4, corticostatin</b>                                |
|                     | <b>348</b>      |                |                 |                 |                                                                        |
| <b>BC015823</b>     | <b>0</b>        | <b>0.0849</b>  | <b>chr3</b>     | <b>LTF</b>      | <b>lactotransferrin</b>                                                |
| <b>BC015822</b>     | <b>4.0395</b>   | <b>0.0926</b>  | <b>chr3</b>     | <b>LTF</b>      | <b>lactotransferrin</b>                                                |
|                     | <b>761</b>      |                |                 |                 |                                                                        |
| NM_001039567        | 0               | 0.111          | chrY            | RPS4Y2          | ribosomal protein S4, Y-linked 2                                       |
| <b>NM_002343</b>    | <b>4.9773</b>   | <b>0.1161</b>  | <b>chr3</b>     | <b>LTF</b>      | <b>lactotransferrin</b>                                                |
|                     | <b>348</b>      |                |                 |                 |                                                                        |
| <b>NM_014893</b>    | <b>0</b>        | <b>0.1291</b>  | <b>chrY</b>     | <b>NLGN4Y</b>   | <b>neuroligin 4, Y-linked</b>                                          |
| <b>BC055089</b>     | <b>0</b>        | <b>0.1412</b>  | <b>chr3</b>     | <b>CAMP</b>     | <b>cathelicidin antimicrobial peptide</b>                              |
| BC005248            | 0               | 0.2904         | chrY            | EIF1AY          | eukaryotic translation initiation factor 1A, Y-linked                  |
| <b>AL133030</b>     | <b>4.0395</b>   | <b>0.4397</b>  | <b>chr22</b>    | <b>KIAA1666</b> | <b>KIAA1666 protein</b>                                                |
|                     | <b>761</b>      |                |                 |                 |                                                                        |

\*Bold words showed eight DEGs have non-significant different between healthy females and healthy males.

**Suppl. Table 2.** Enriched signaling pathways with significant association with 26 DEGs (SLE females/ SLE males)

|                                                                                   | No. of genes | p-Value  |
|-----------------------------------------------------------------------------------|--------------|----------|
| <i>Kegg pathways</i>                                                              |              |          |
| Ribosome                                                                          | 1            | 0.019865 |
| <i>Genmapp pathways</i>                                                           |              |          |
| GO_Samples--Biological process--spermatogenesis                                   | 2            | 2.42E-04 |
| GO_Samples--Cellular component--male gamete generation                            | 2            | 2.42E-04 |
| GO_Samples--Cellular component--gametogenesis                                     | 2            | 3.68E-04 |
| Tissue-specific--Hs_1-Tissue-Blood_and_Lymph                                      | 2            | 4.30E-04 |
| GO_Samples--Biological process--sexual reproduction                               | 2            | 5.67E-04 |
| GO_Samples--Biological process--reproduction                                      | 2            | 9.37E-04 |
| Contributed--cellular_process--Hs_Translation_Factors                             | 1            | 0.009782 |
| Contributed--molecular_function--Hs_Ribosomal_Proteins                            | 1            | 0.01716  |
| GO_Samples--Molecular function--translation factor activity, nucleic acid binding | 1            | 0.019286 |
| GO_Samples--Biological process--cell ion homeostasis                              | 1            | 0.019286 |
| GO_Samples--Biological process--di-, tri-valent inorganic cation transport        | 1            | 0.019479 |
| GO_Samples--Molecular function--translation regulator activity                    | 1            | 0.019672 |
| GO_Samples--Molecular function--cysteine-type endopeptidase activity              | 1            | 0.020251 |
| GO_Samples--Biological process--ion homeostasis                                   | 1            | 0.021216 |
| GO_Samples--Biological process--cell homeostasis                                  | 1            | 0.021408 |
| GO_Samples--Biological process--ubiquitin-dependent protein catabolism            | 1            | 0.021986 |
| GO_Samples--Molecular function--cysteine-type peptidase activity                  | 1            | 0.024104 |
| GO_Samples--Molecular function--helicase activity                                 | 1            | 0.024872 |
| GO_Samples--Molecular function--serine-type endopeptidase activity                | 1            | 0.028517 |
| GO_Samples--Biological process--humoral immune response                           | 1            | 0.030048 |
| GO_Samples--Molecular Function--catalytic activity                                | 1            | 0.031386 |
| GO_Samples--Biological process--translation                                       | 1            | 0.03215  |
| GO_Samples--Molecular function--lipid binding                                     | 1            | 0.035961 |
| GO_Samples--Biological process--response to chemical substance                    | 1            | 0.039189 |
| GO_Samples--Biological process--ubiquitin cycle                                   | 1            | 0.046371 |
| GO_Samples--Cellular component--cytosol                                           | 1            | 0.048818 |
| GO_Samples--Cellular component--extracellular space                               | 1            | 0.052195 |

**Suppl. Table 3.** Top ten enriched signaling pathways with significant association with DEGs (SLE females/SLE males)

|                                                   | <b>No. of genes</b> | <b>p-Value</b> |
|---------------------------------------------------|---------------------|----------------|
| <b>KEGG pathways</b>                              |                     |                |
| Ribosome                                          | 1                   | 0.019865       |
| <b>Biocarta pathways</b>                          |                     |                |
| novel                                             |                     |                |
| <b>Genmapp pathways</b>                           |                     |                |
| spermatogenesis                                   | 2                   | 2.42E-04       |
| male gamete generation                            | 2                   | 2.42E-04       |
| gametogenesis                                     | 2                   | 3.68E-04       |
| Blood_and_Lymph                                   | 2                   | 4.30E-04       |
| sexual reproduction                               | 2                   | 5.67E-04       |
| reproduction                                      | 2                   | 9.37E-04       |
| Translation_Factors                               | 1                   | 0.009782       |
| Ribosomal_Proteins                                | 1                   | 0.01716        |
| translation factor activity, nucleic acid binding | 1                   | 0.019286       |
| cell ion homeostasis                              | 1                   | 0.019286       |

**Suppl. Table 4.** Top ten enriched signaling pathways with significant association with estrogen-relevant DEGs (SLE females/SLE males)

|                                                   | <b>No. of genes</b> | <b>p-Value</b> |
|---------------------------------------------------|---------------------|----------------|
| <b>KEGG pathways</b>                              |                     |                |
| Ribosome                                          | 1                   | 0.013287258    |
| <b>Biocarta pathways</b>                          |                     |                |
| novel                                             |                     |                |
| <b>Genmapp pathways</b>                           |                     |                |
| Blood_and_Lymph                                   | 2                   | 1.80E-04       |
| Translation_Factors                               | 1                   | 0.006531869    |
| Ribosomal_Proteins                                | 1                   | 0.011472277    |
| translation factor activity, nucleic acid binding | 1                   | 0.012898568    |
| cell ion homeostasis                              | 1                   | 0.012898568    |
| di-, tri-valent inorganic cation transport        | 1                   | 0.013028145    |
| translation regulator activity                    | 1                   | 0.013157709    |
| ion homeostasis                                   | 1                   | 0.014193707    |
| cell homeostasis                                  | 1                   | 0.014323143    |
| helicase activity                                 | 1                   | 0.016650571    |

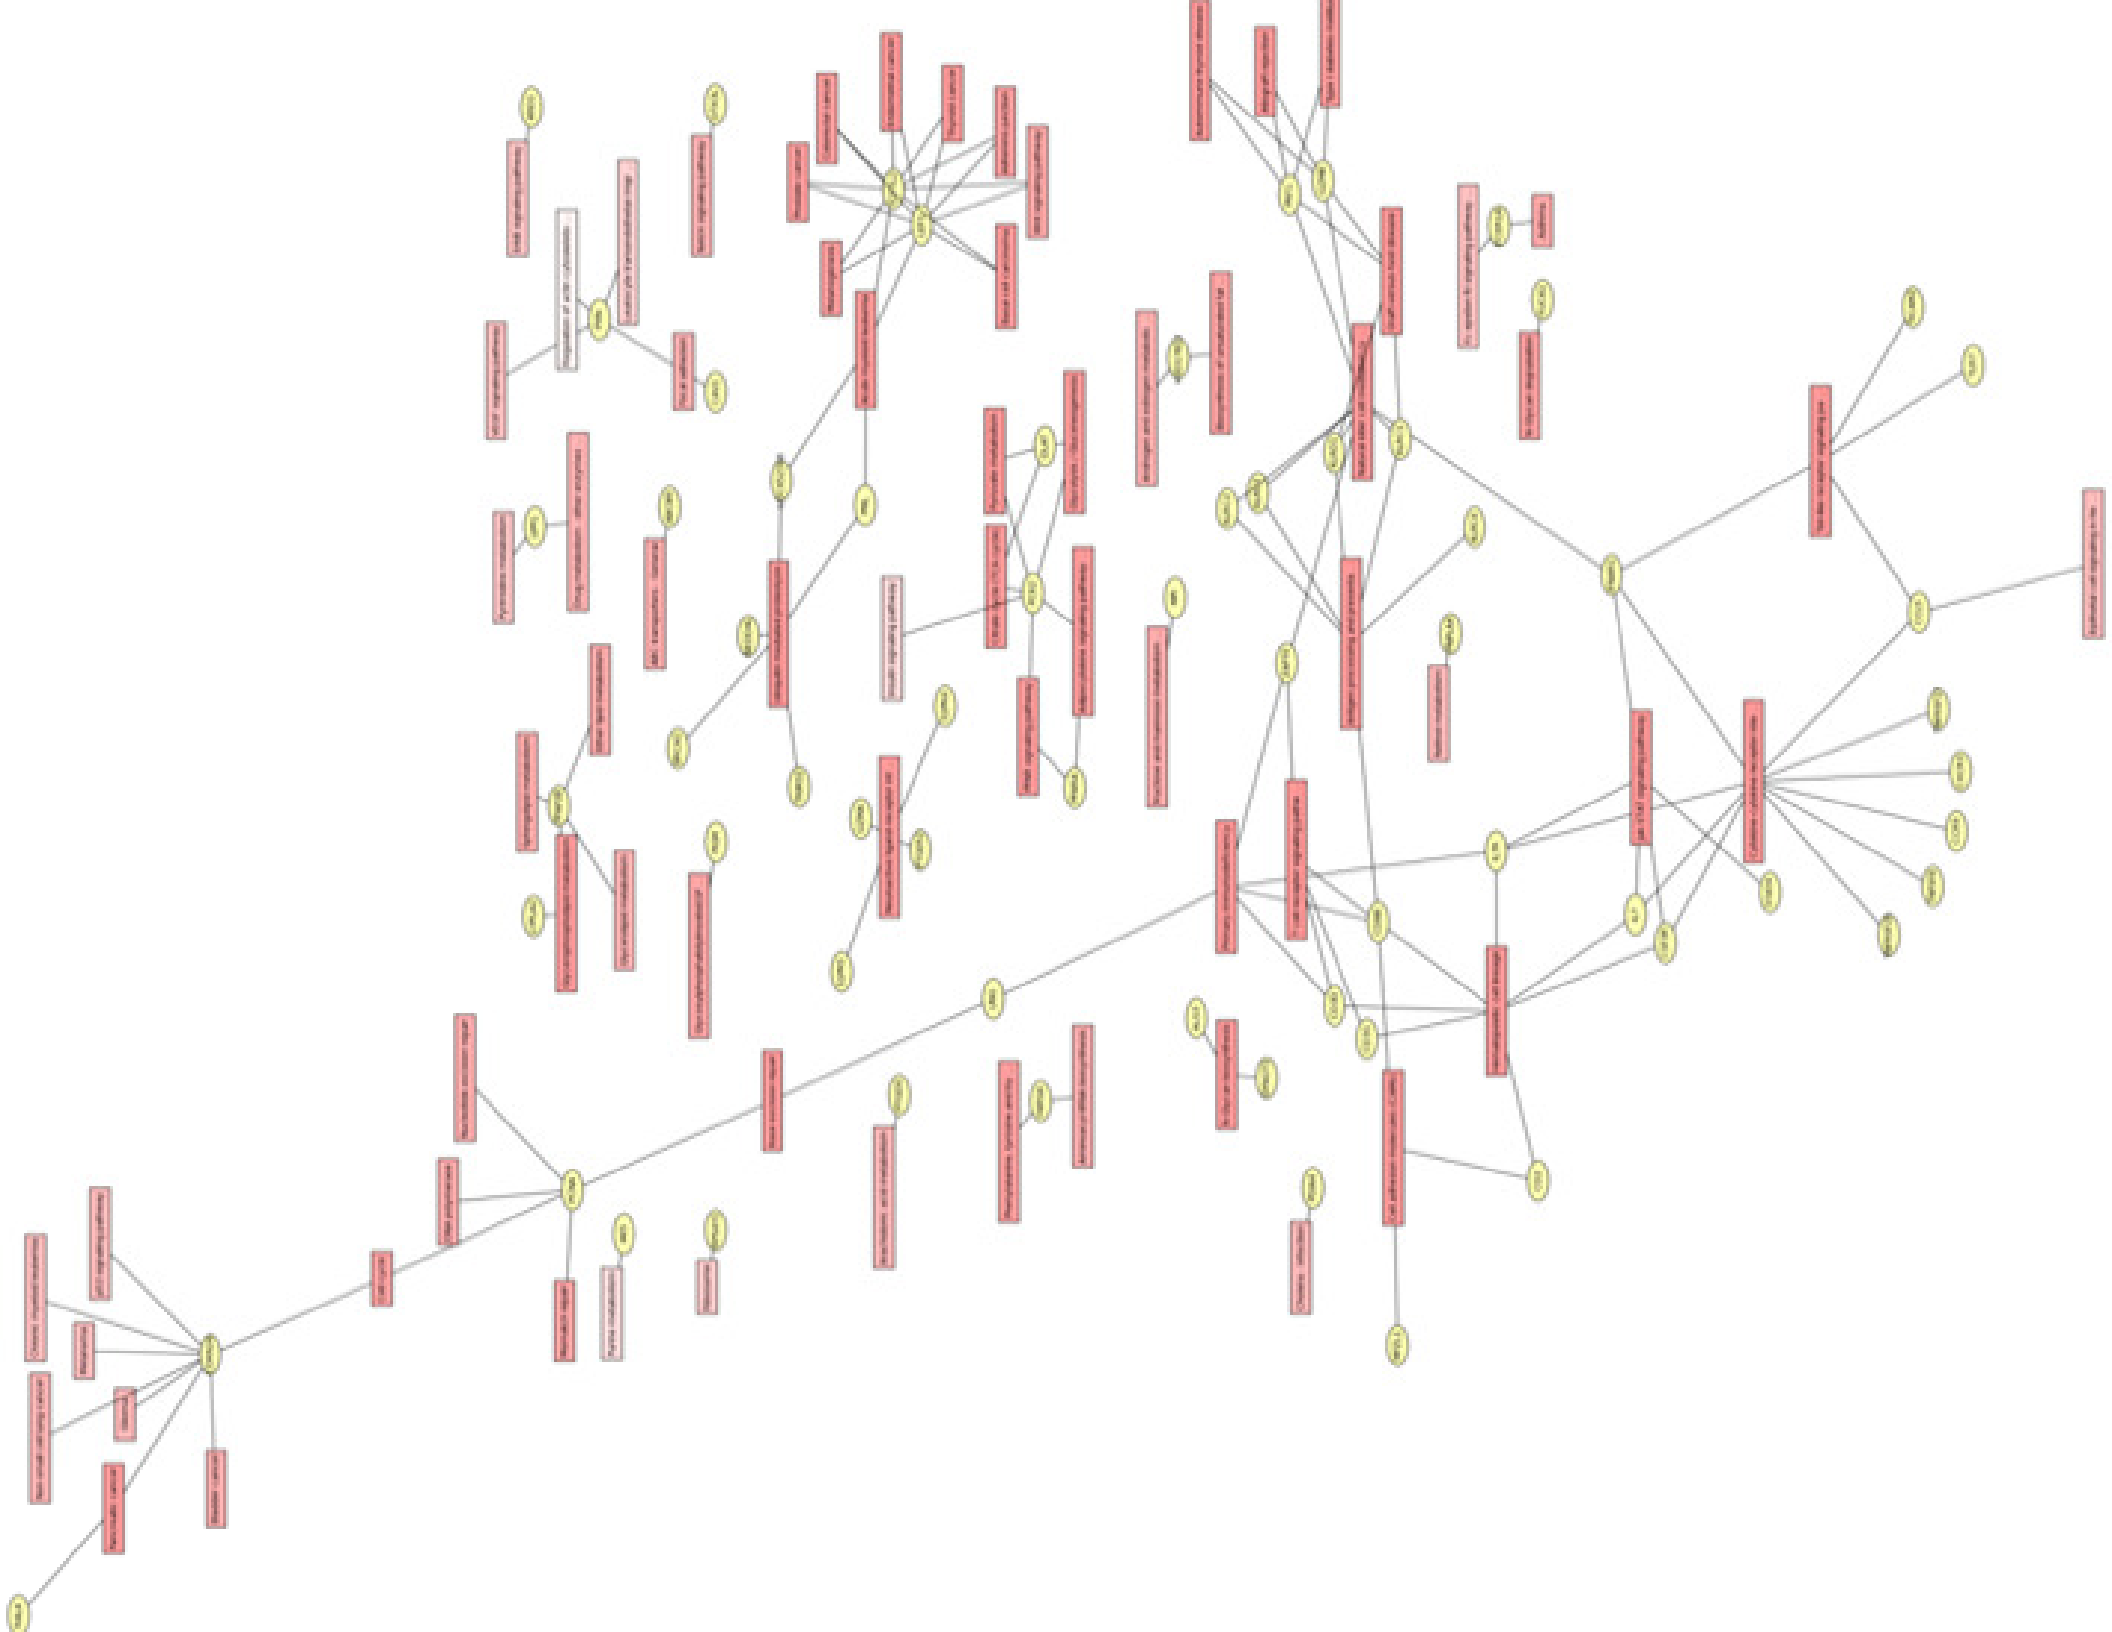

Supplement: 814598.f1.pdf [file 814598.f1.pdf]
